# Supplementary material
Source: ML conference proceedings conference paper supplement (https://openreview.net/forum?id=r0xM0IIi5g9)

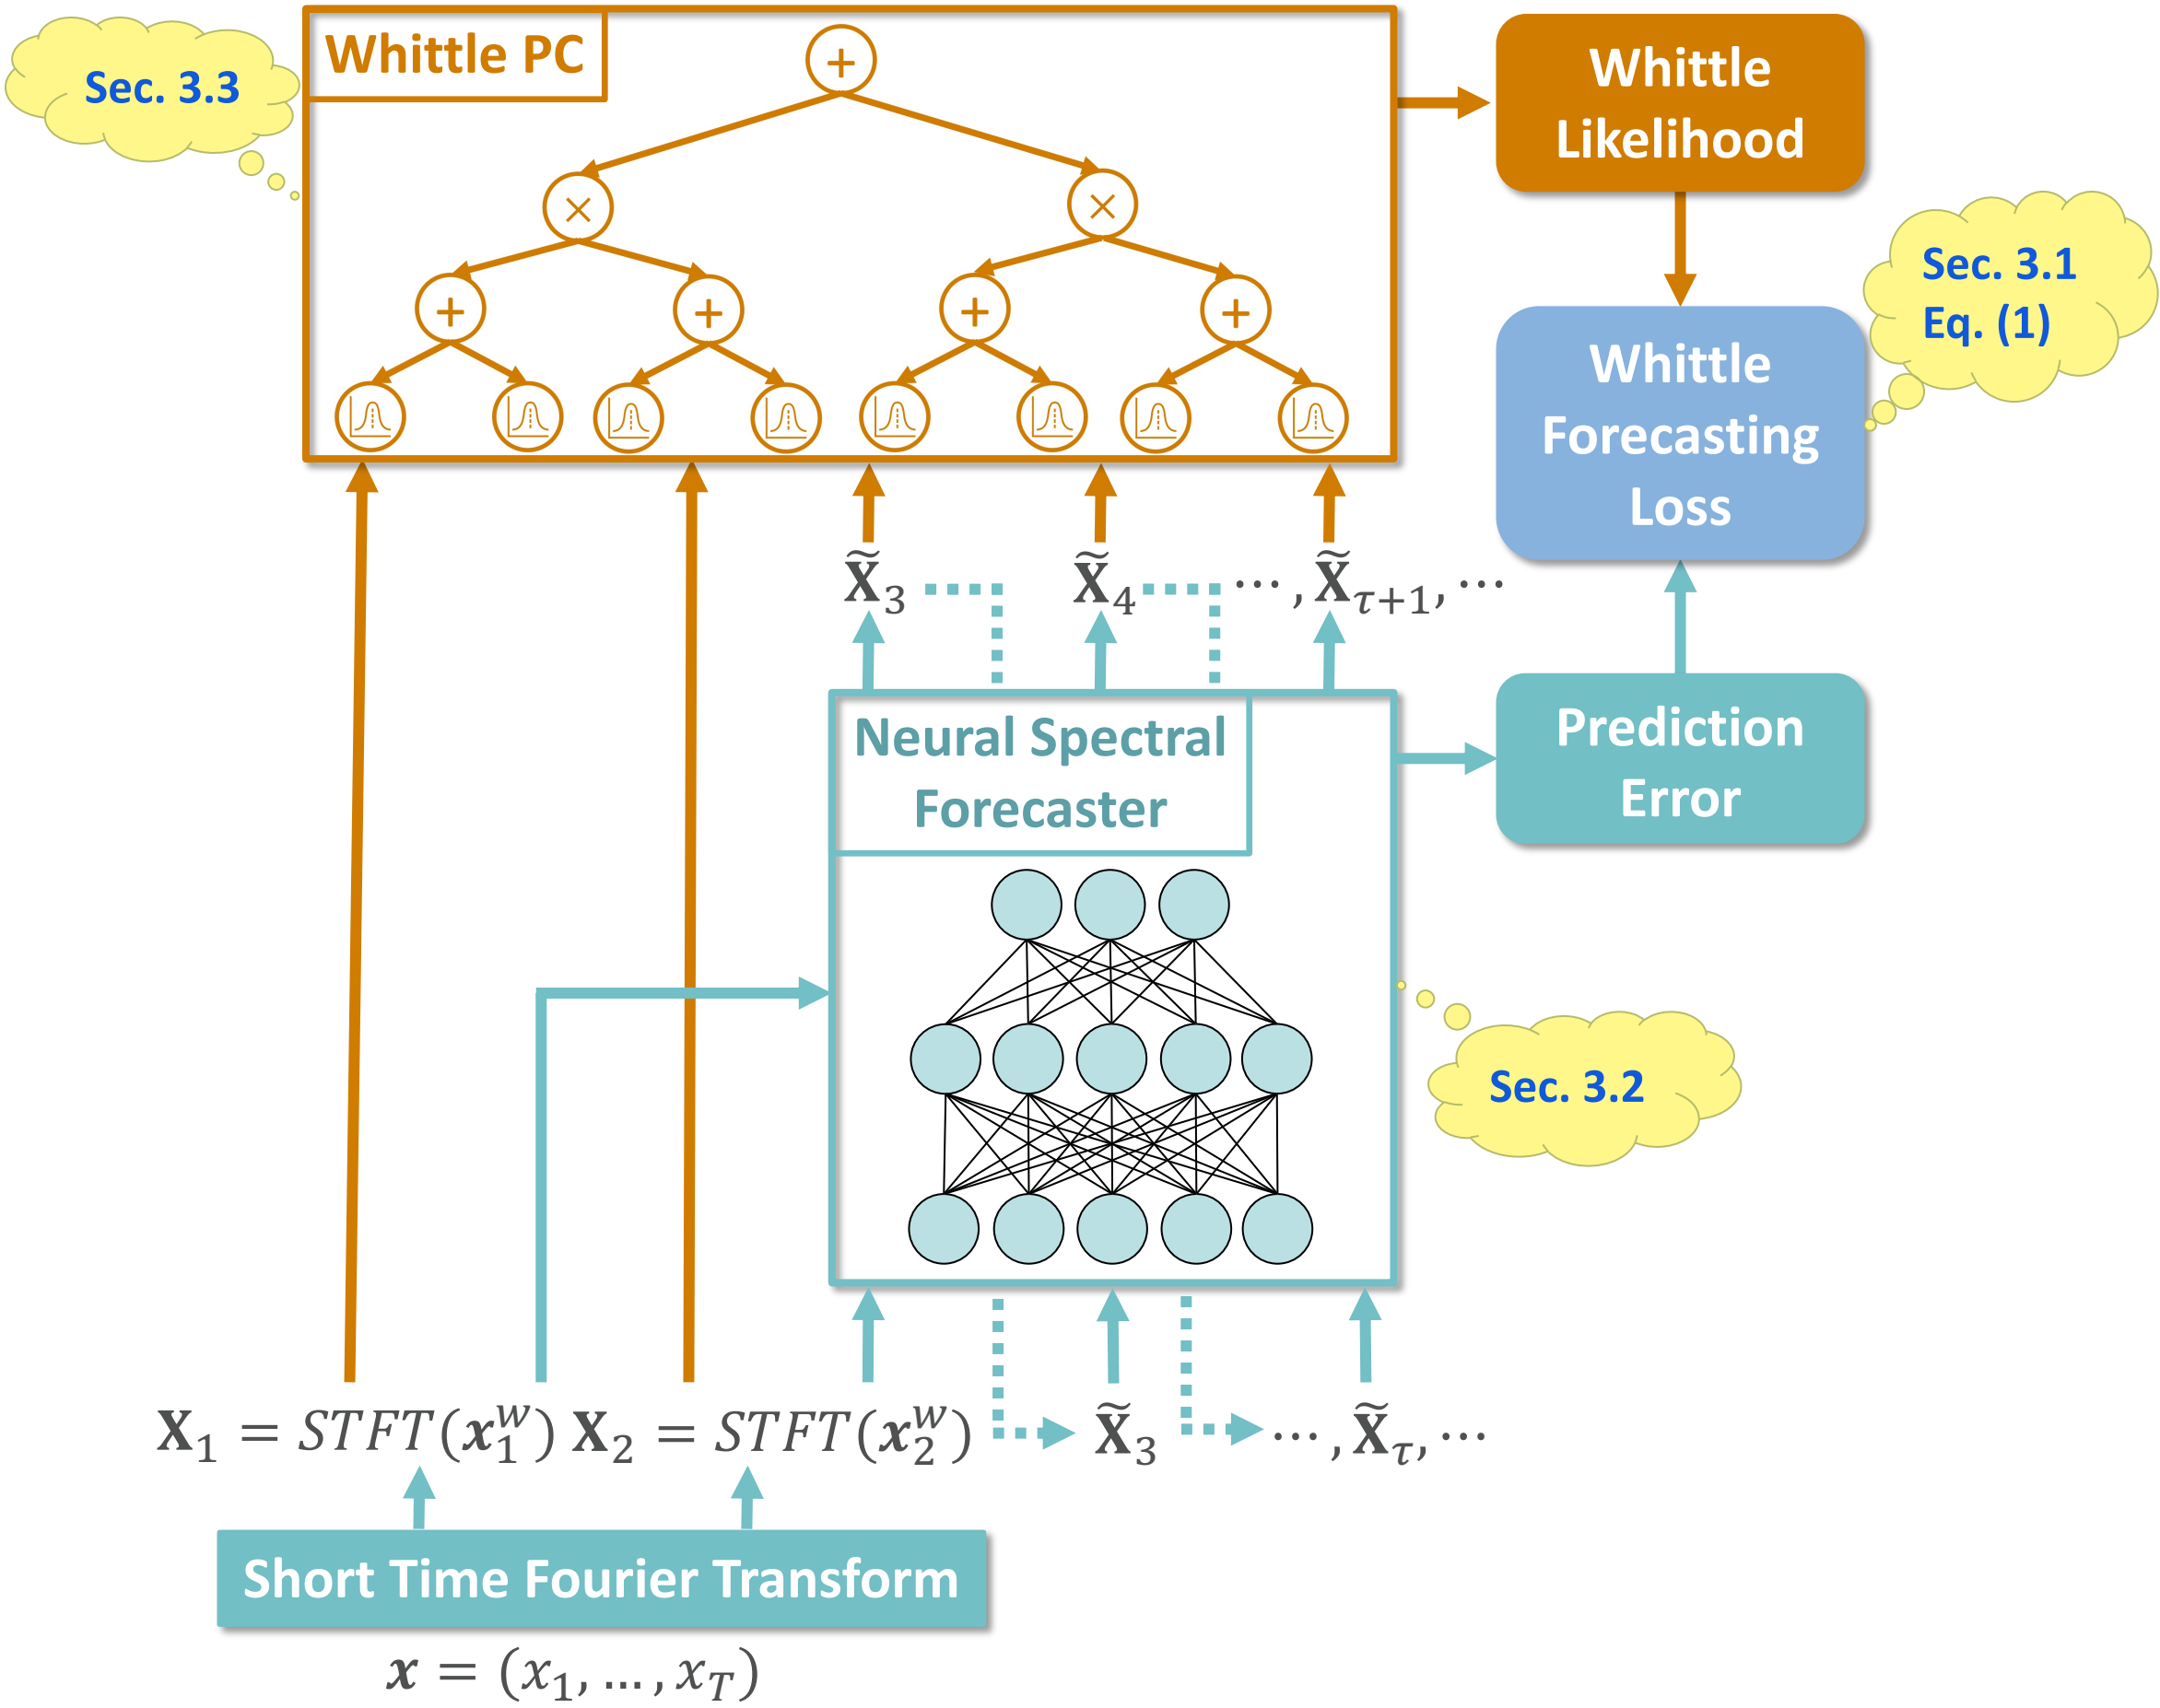

Supplement: supplementary_material [file attachment]

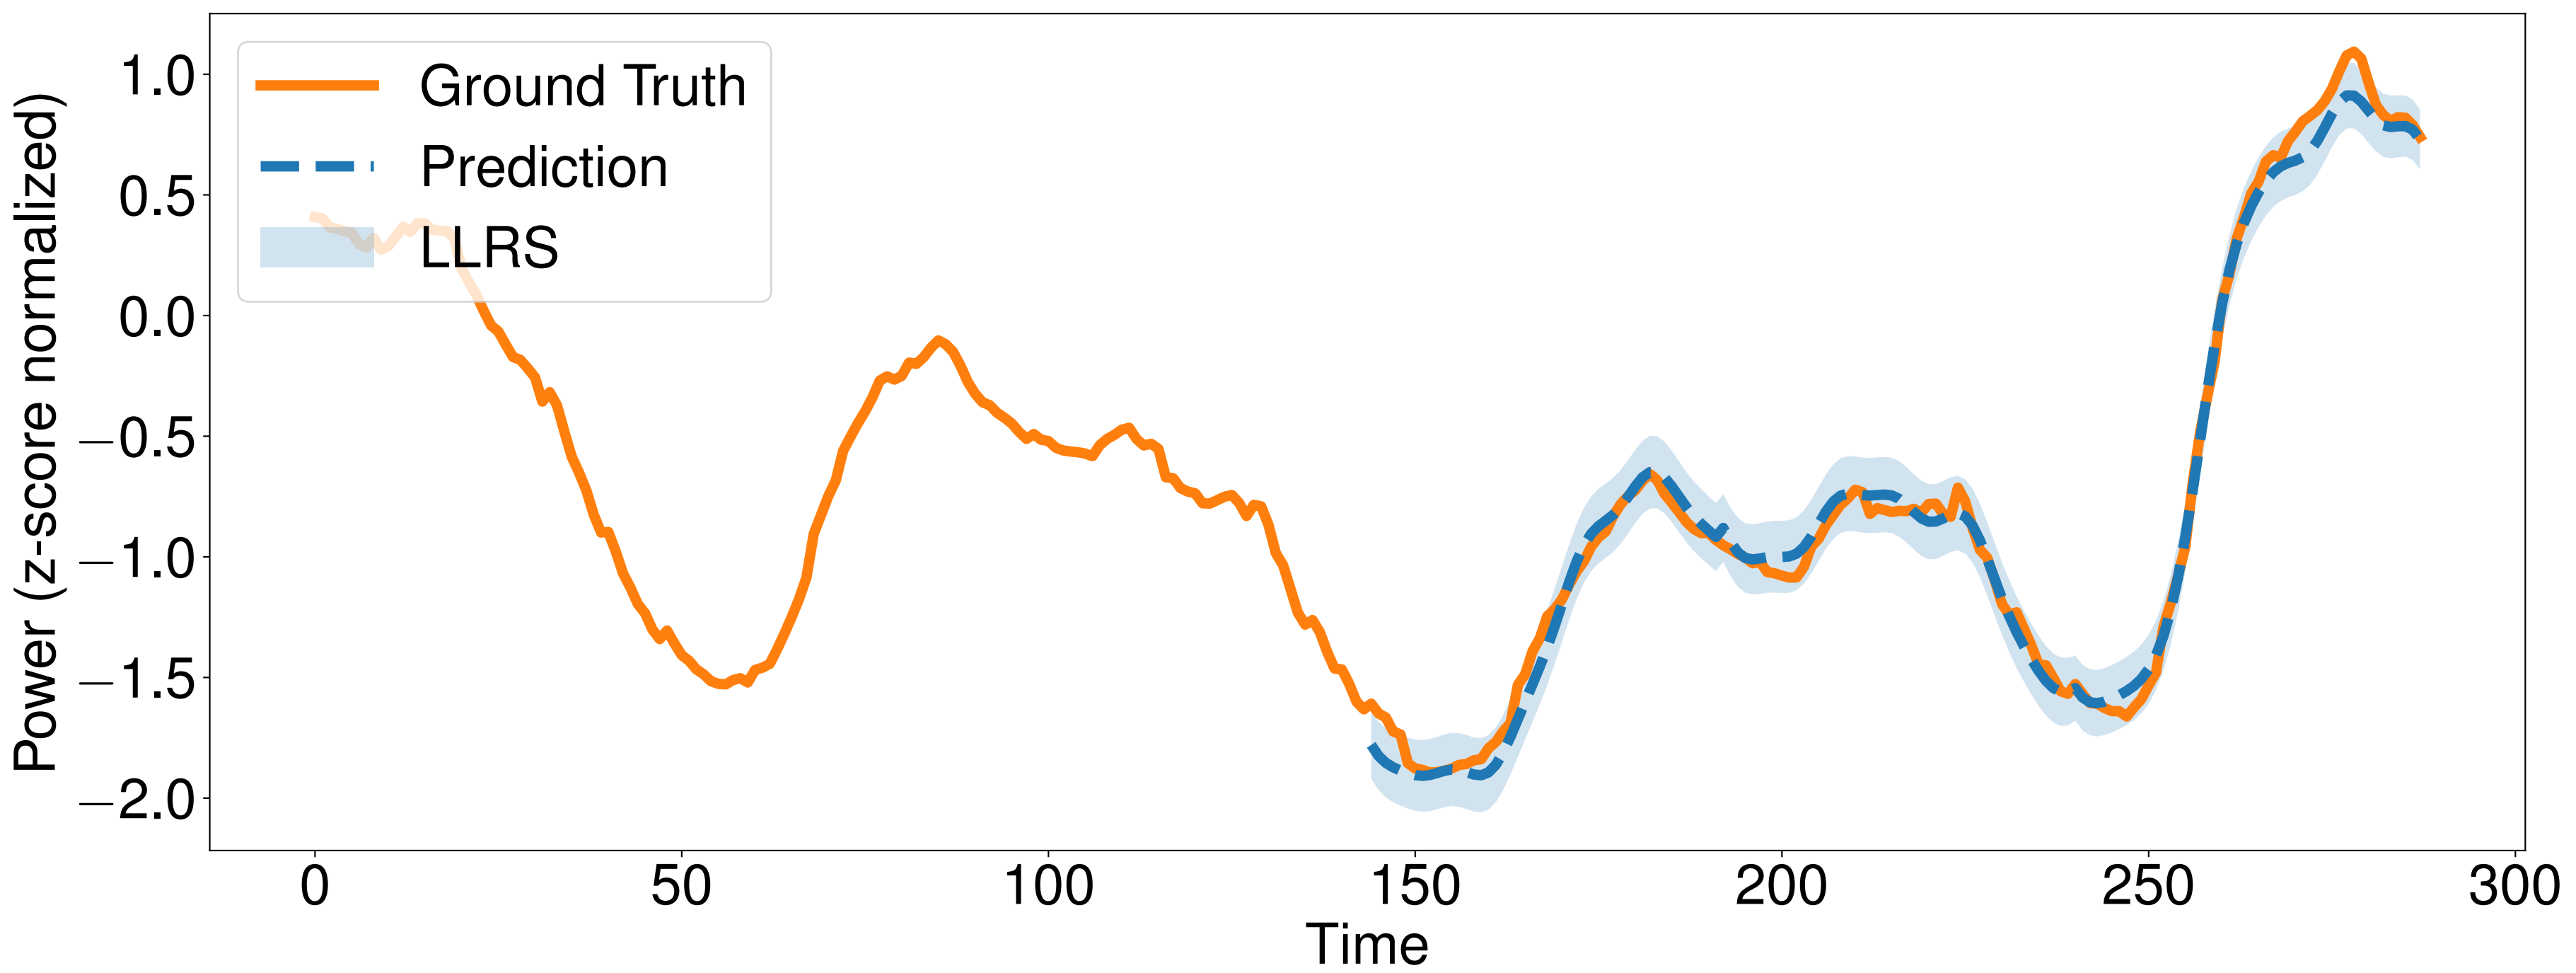

Supplement: supplementary_material [file attachment]

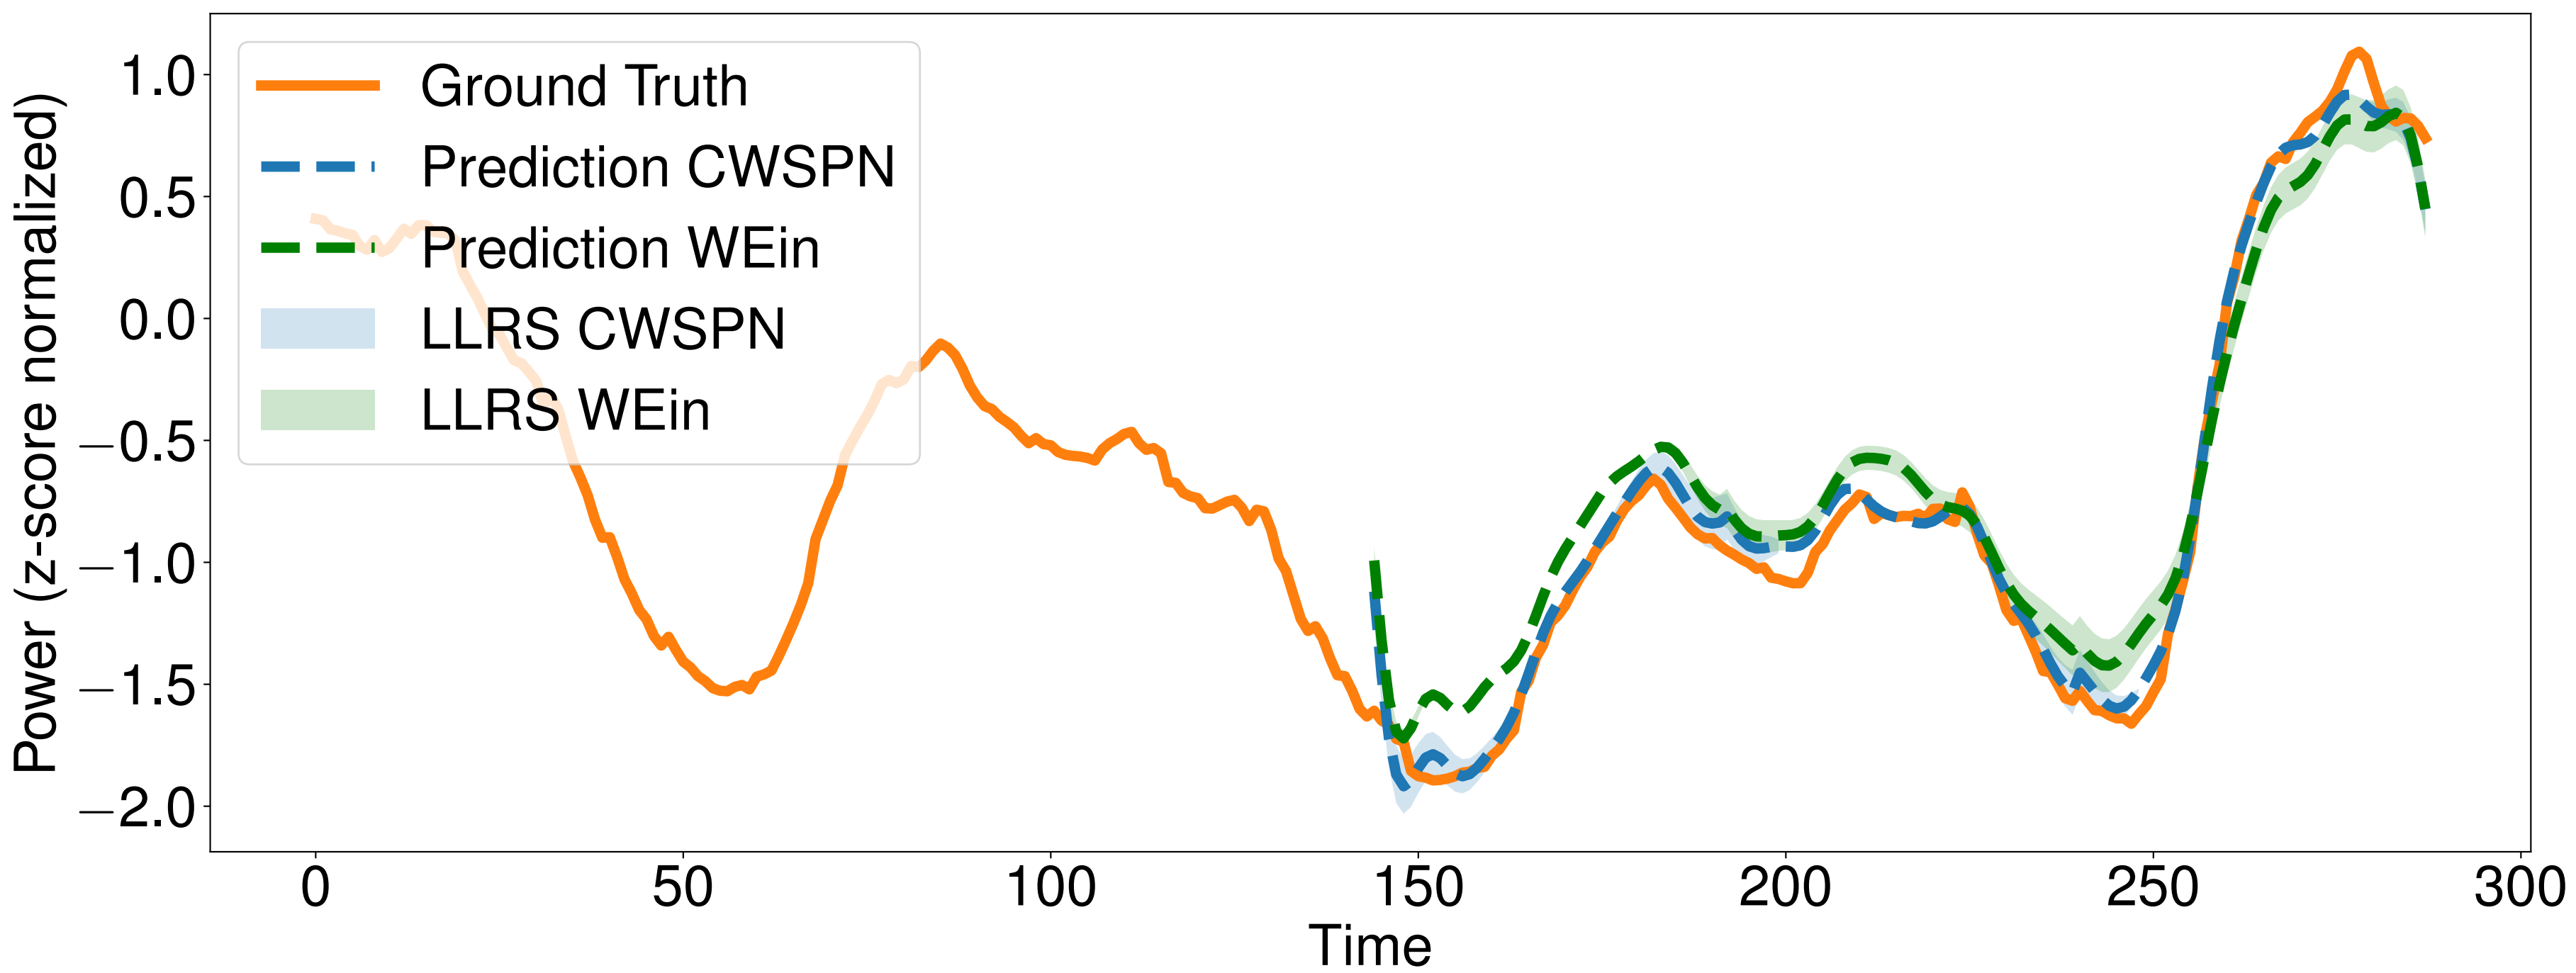

Supplement: supplementary_material [file attachment]

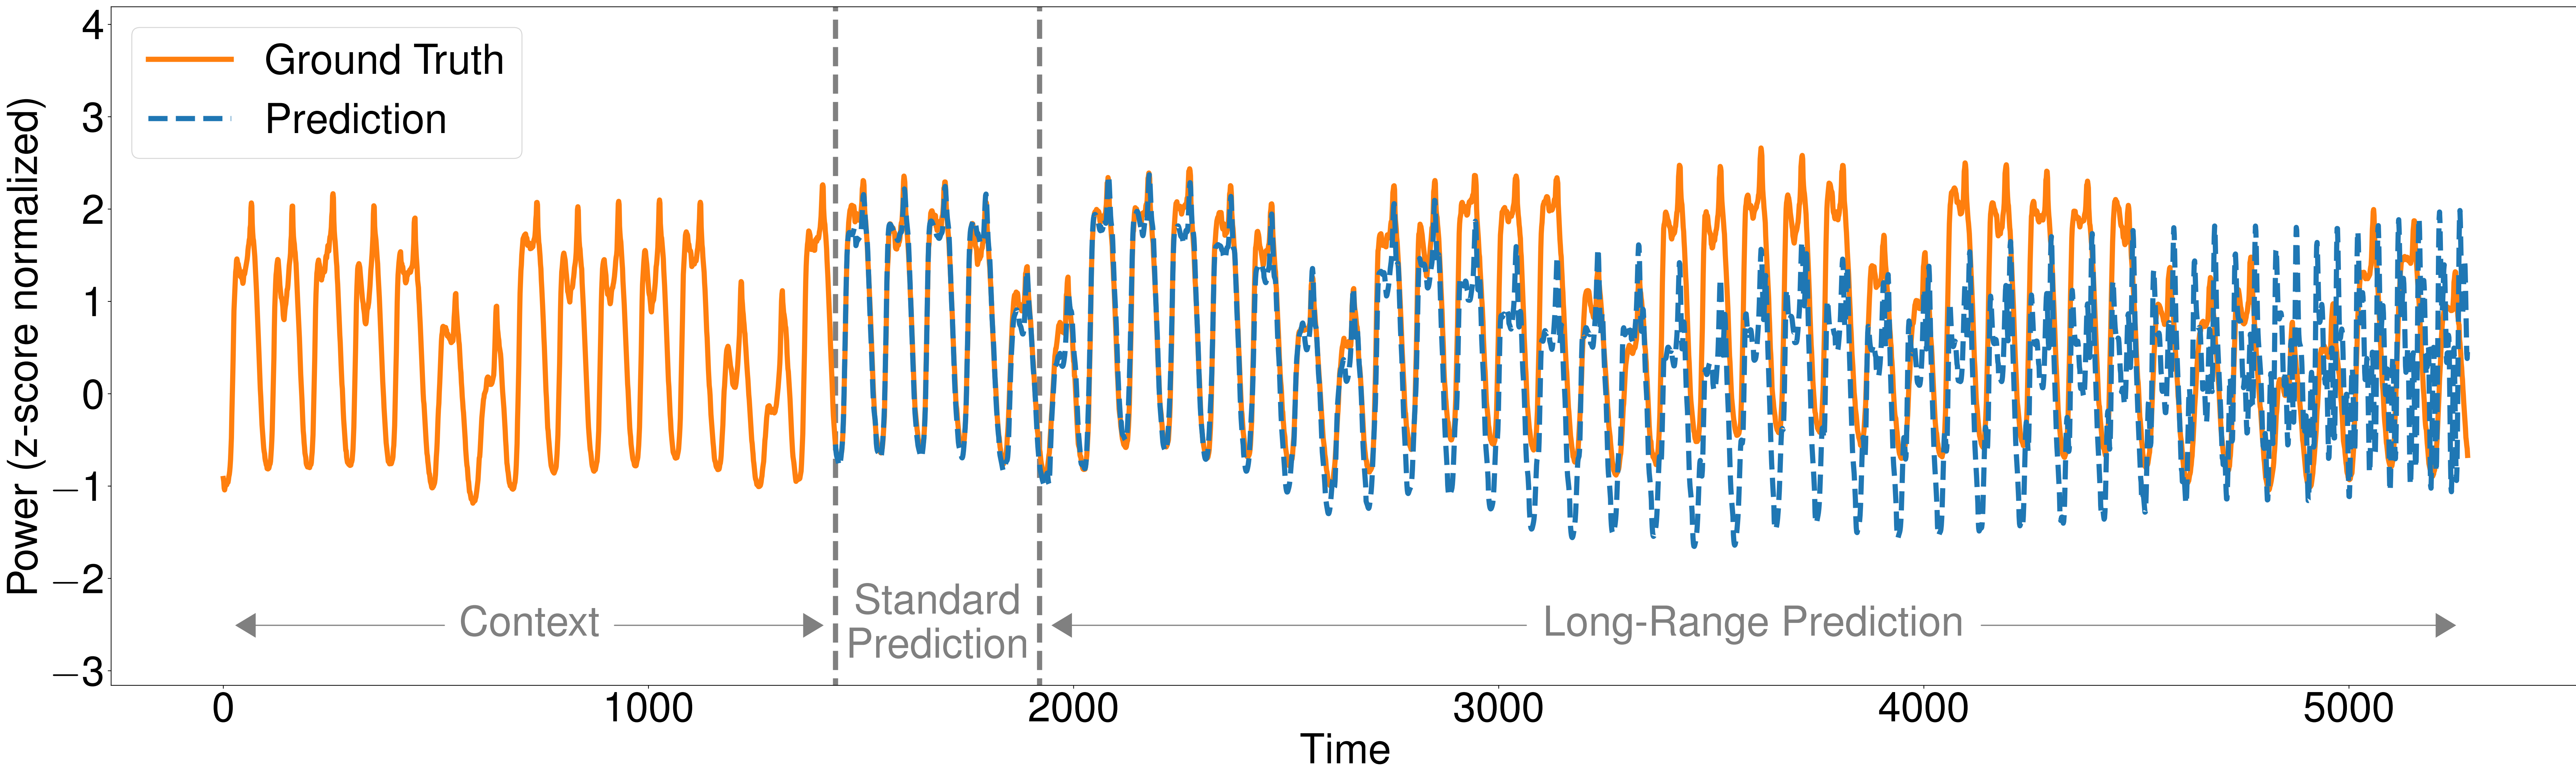

Supplement: supplementary_material [file attachment]

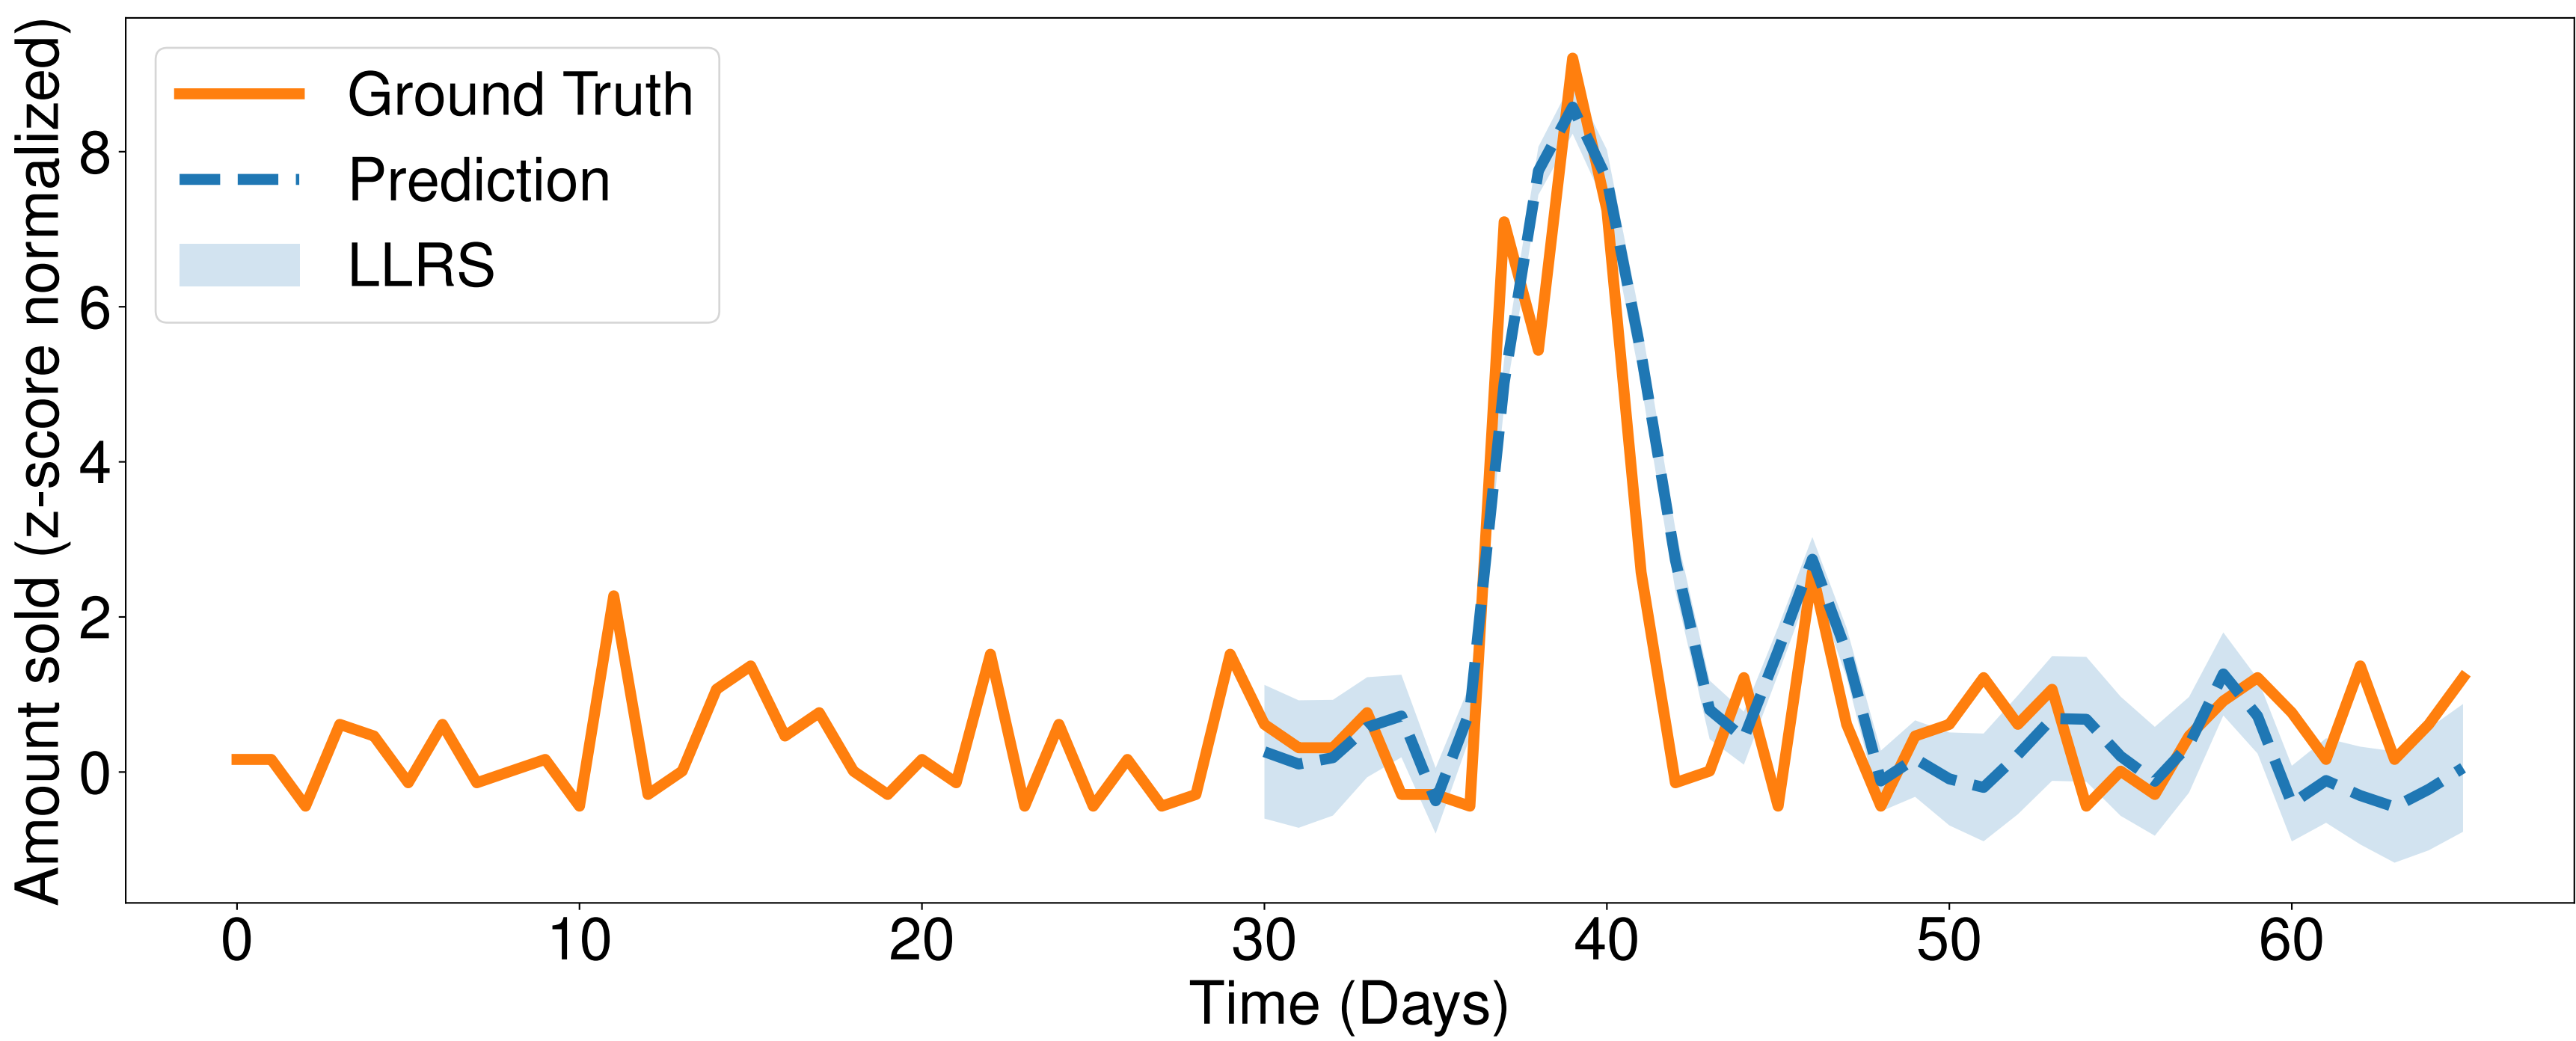

Supplement: supplementary_material [file attachment]

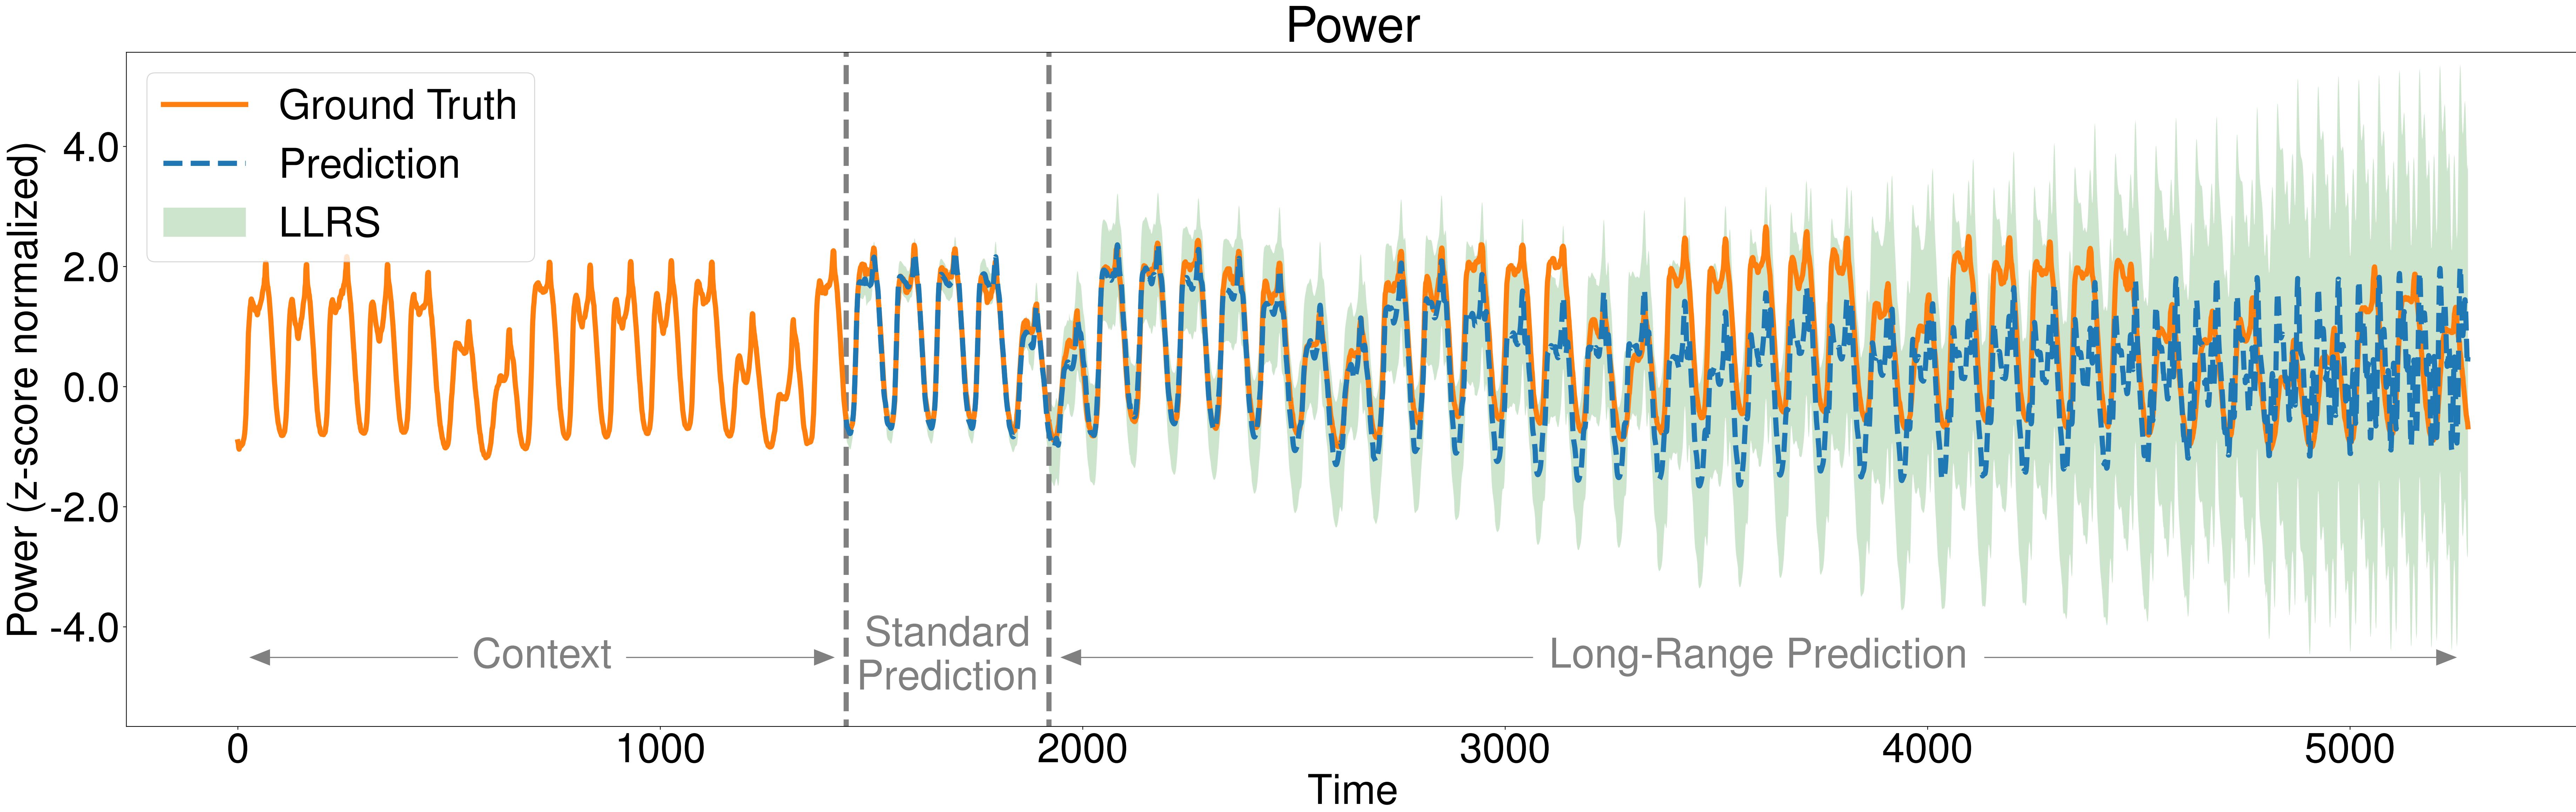

Supplement: supplementary_material [file attachment]

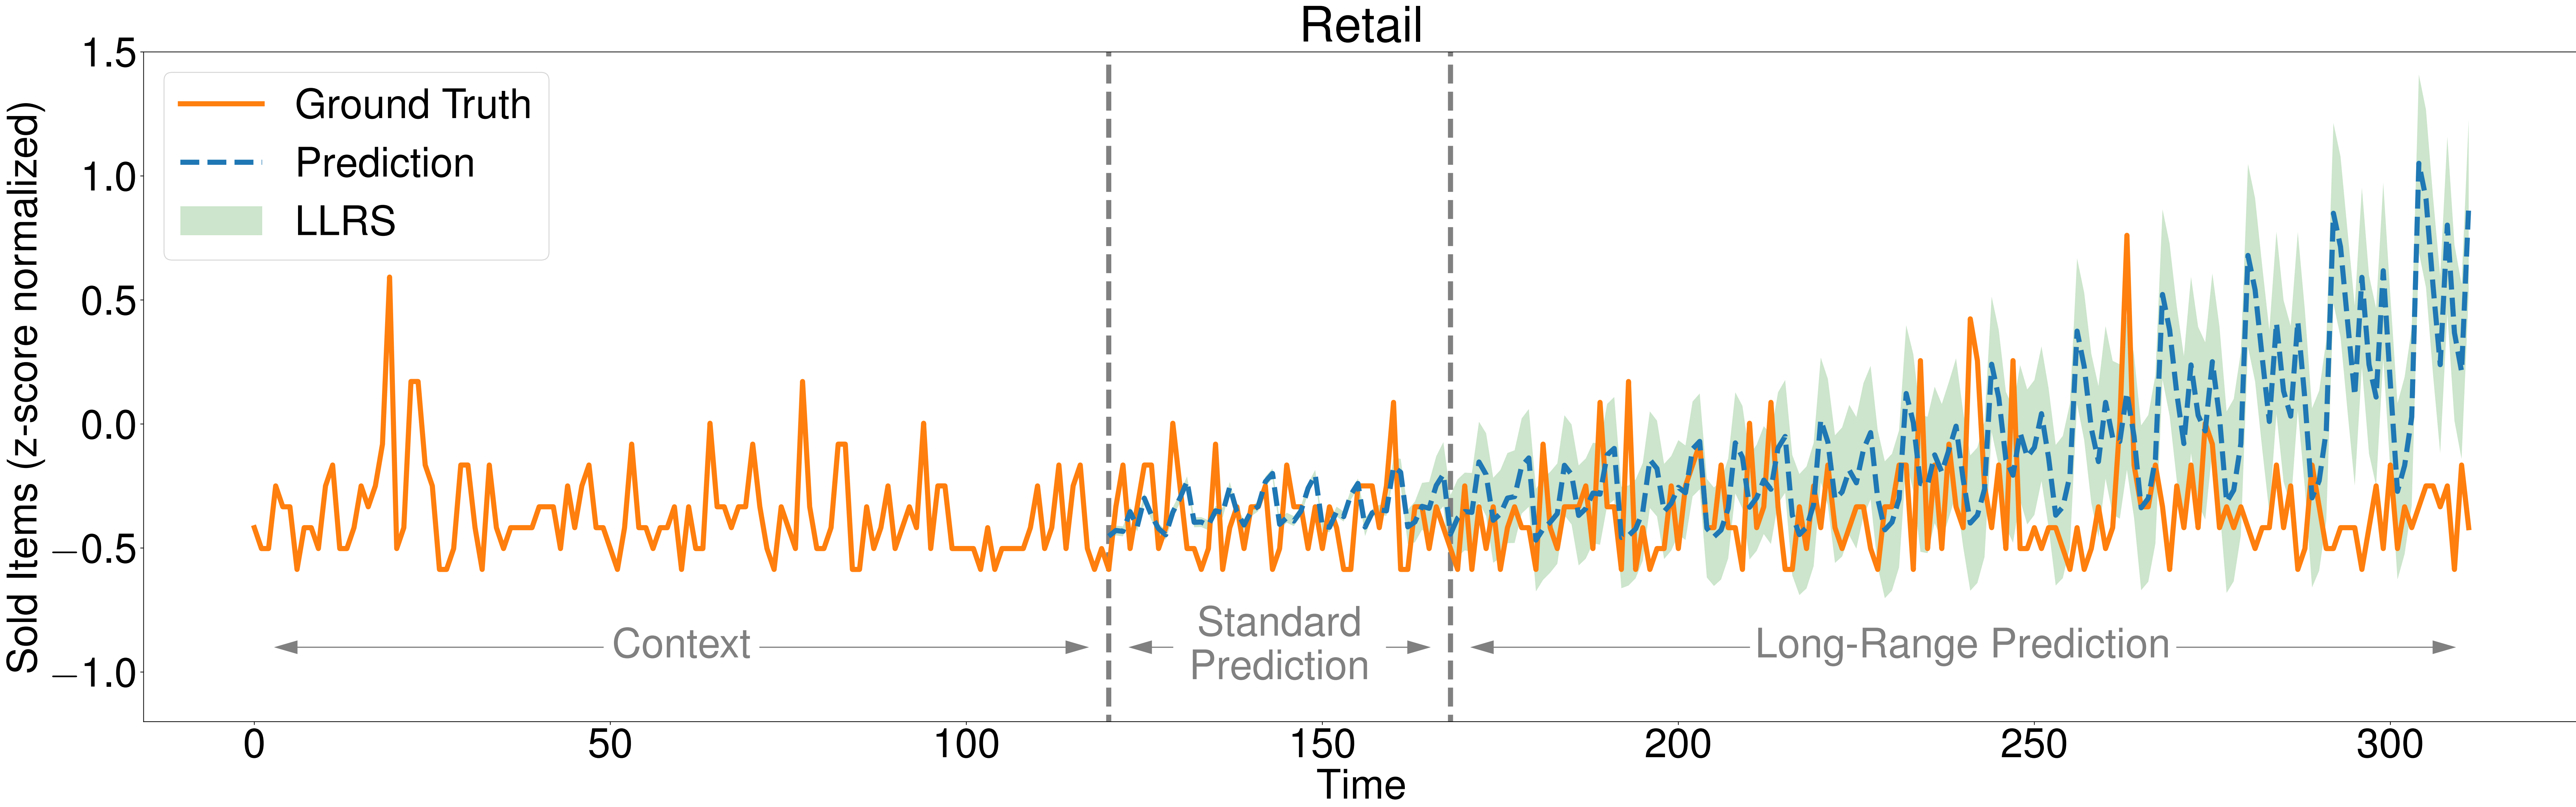

Supplement: supplementary_material [file attachment]

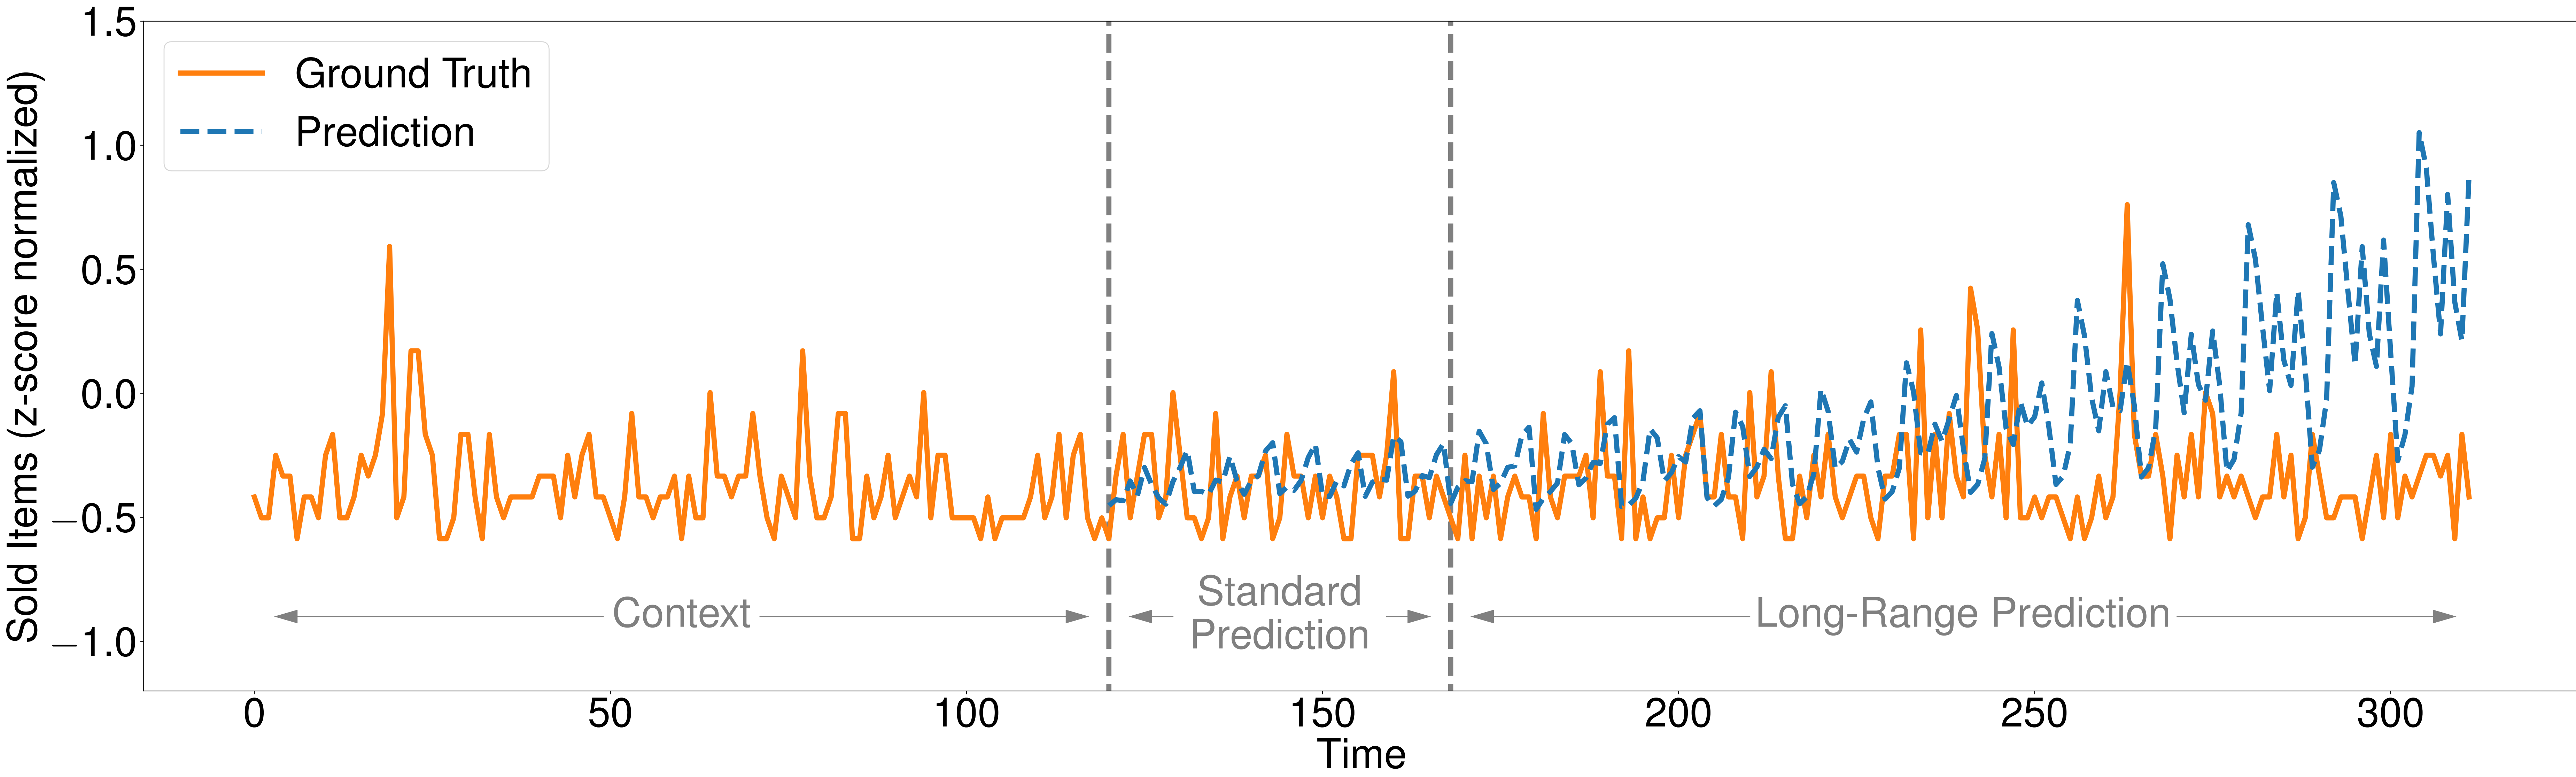

Supplement: supplementary_material [file attachment]

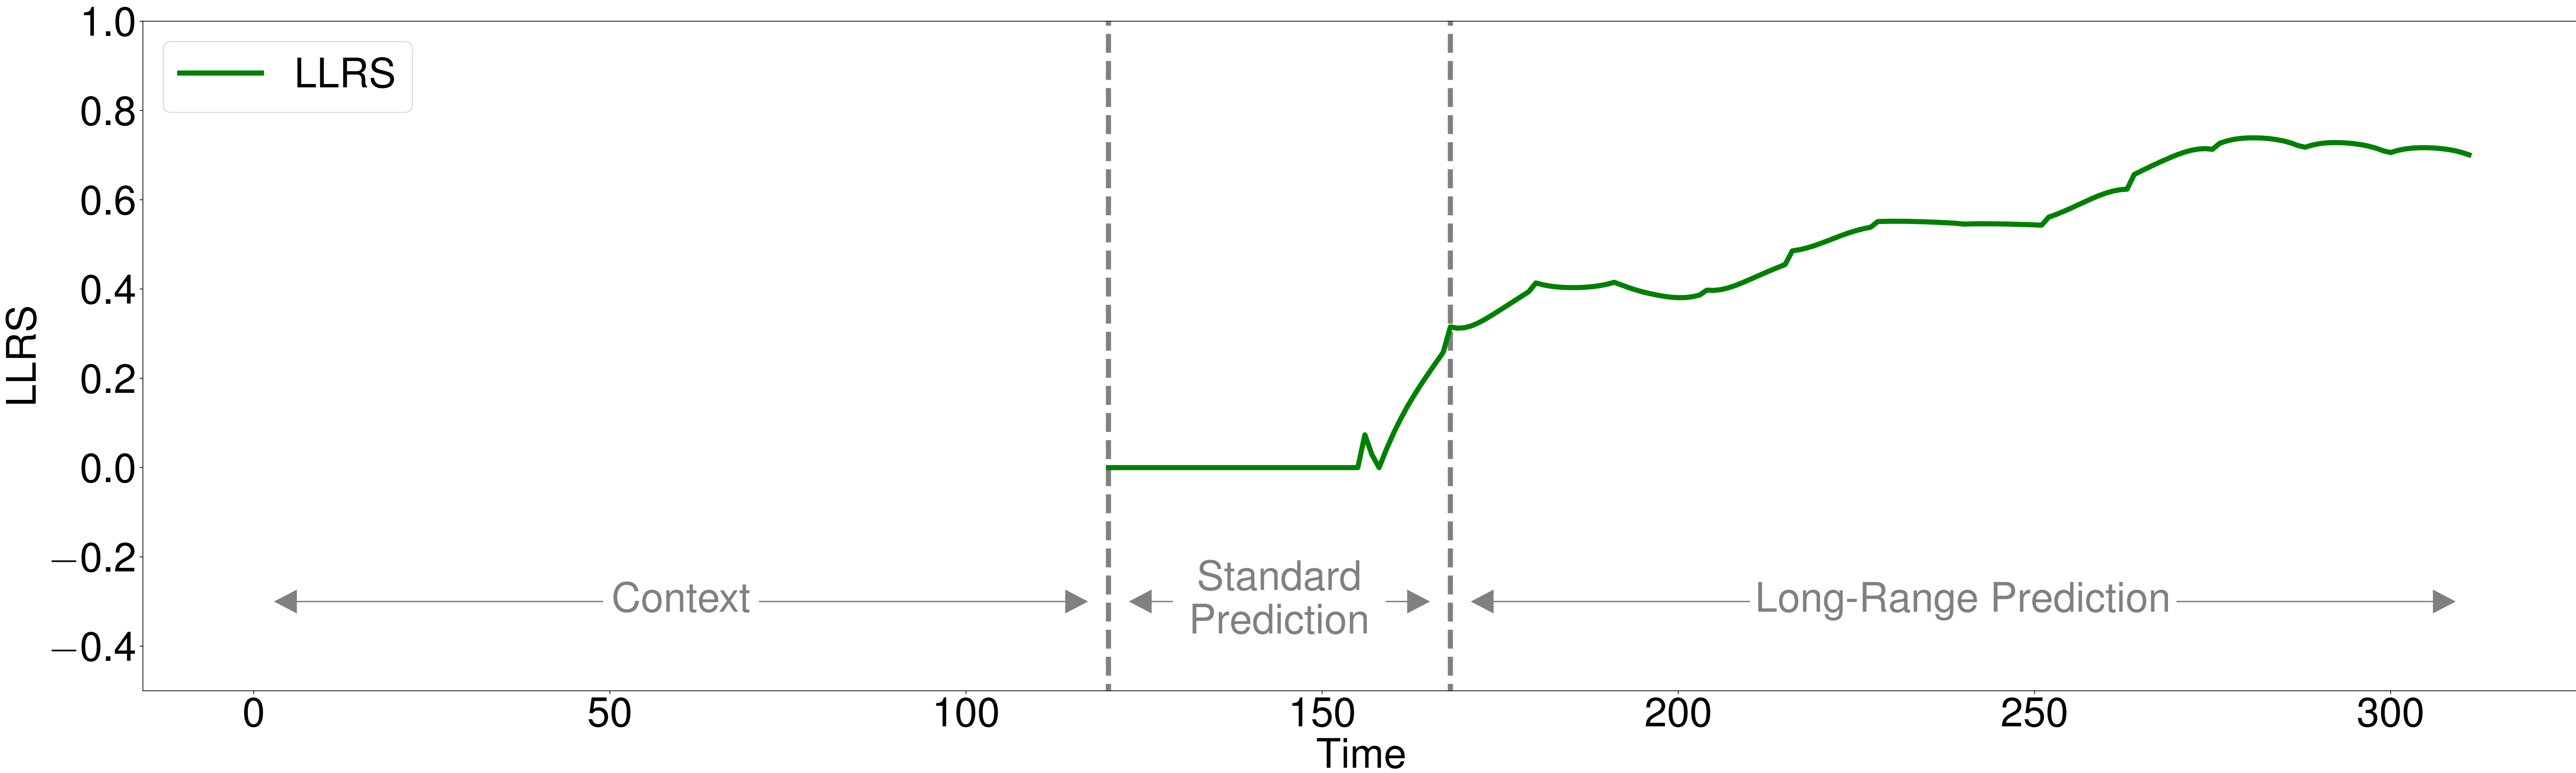

Supplement: supplementary_material [file attachment]

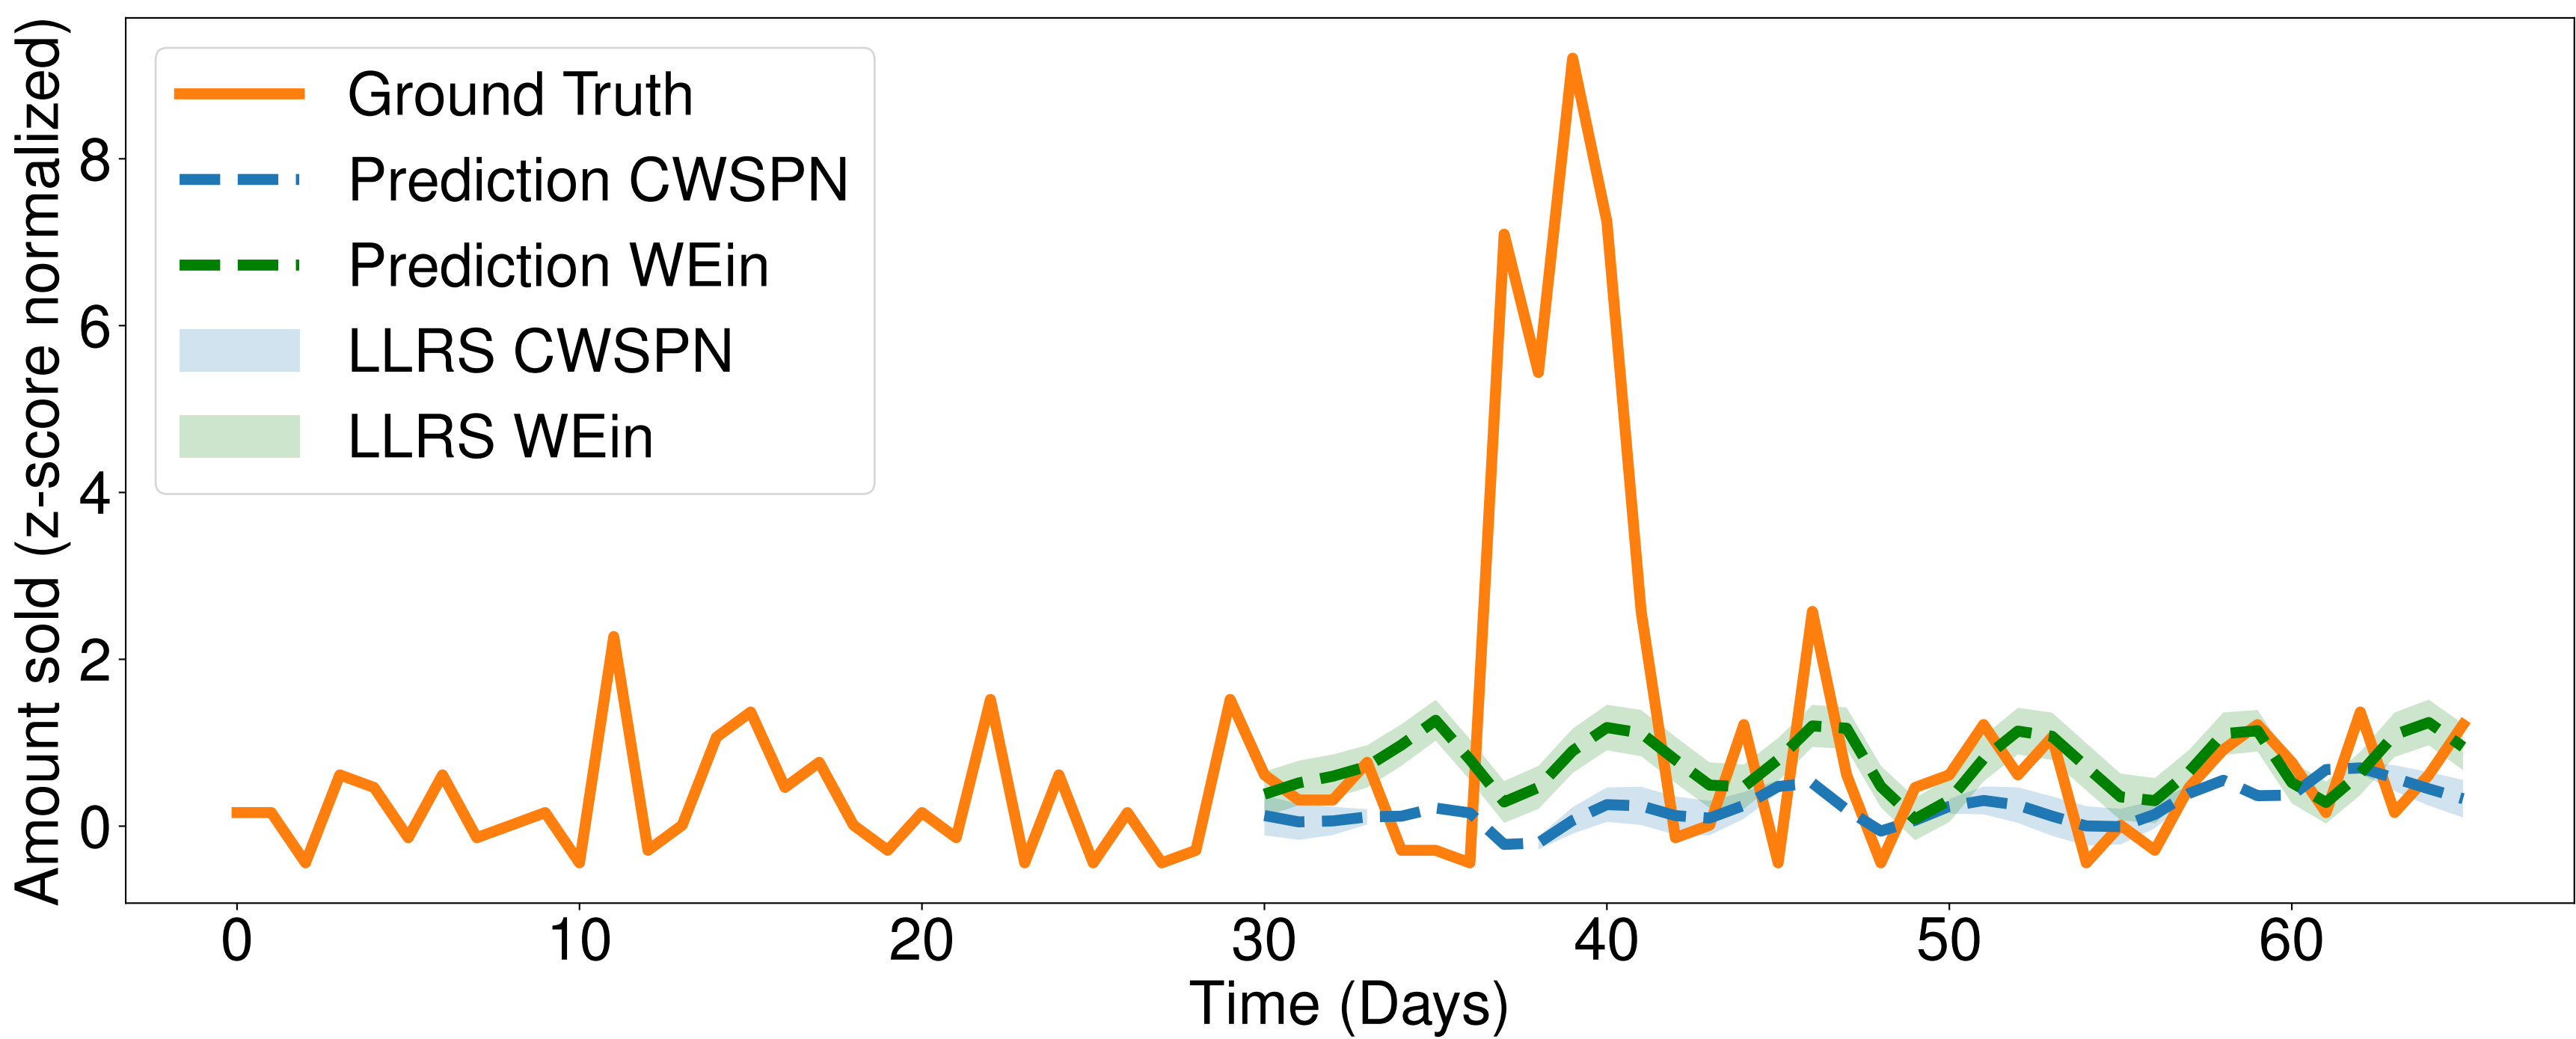

Supplement: supplementary_material [file attachment]

# Retail

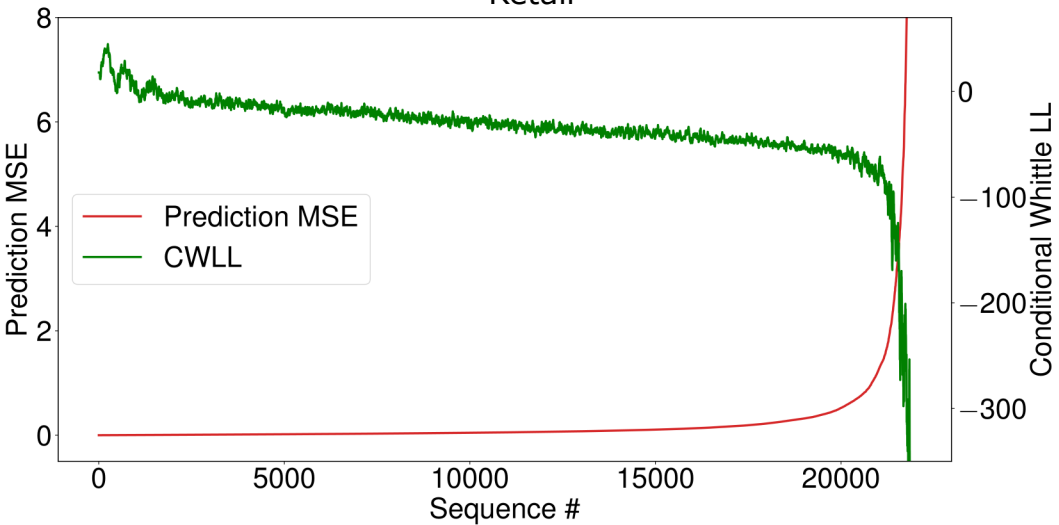

Supplement: supplementary_material [file attachment]

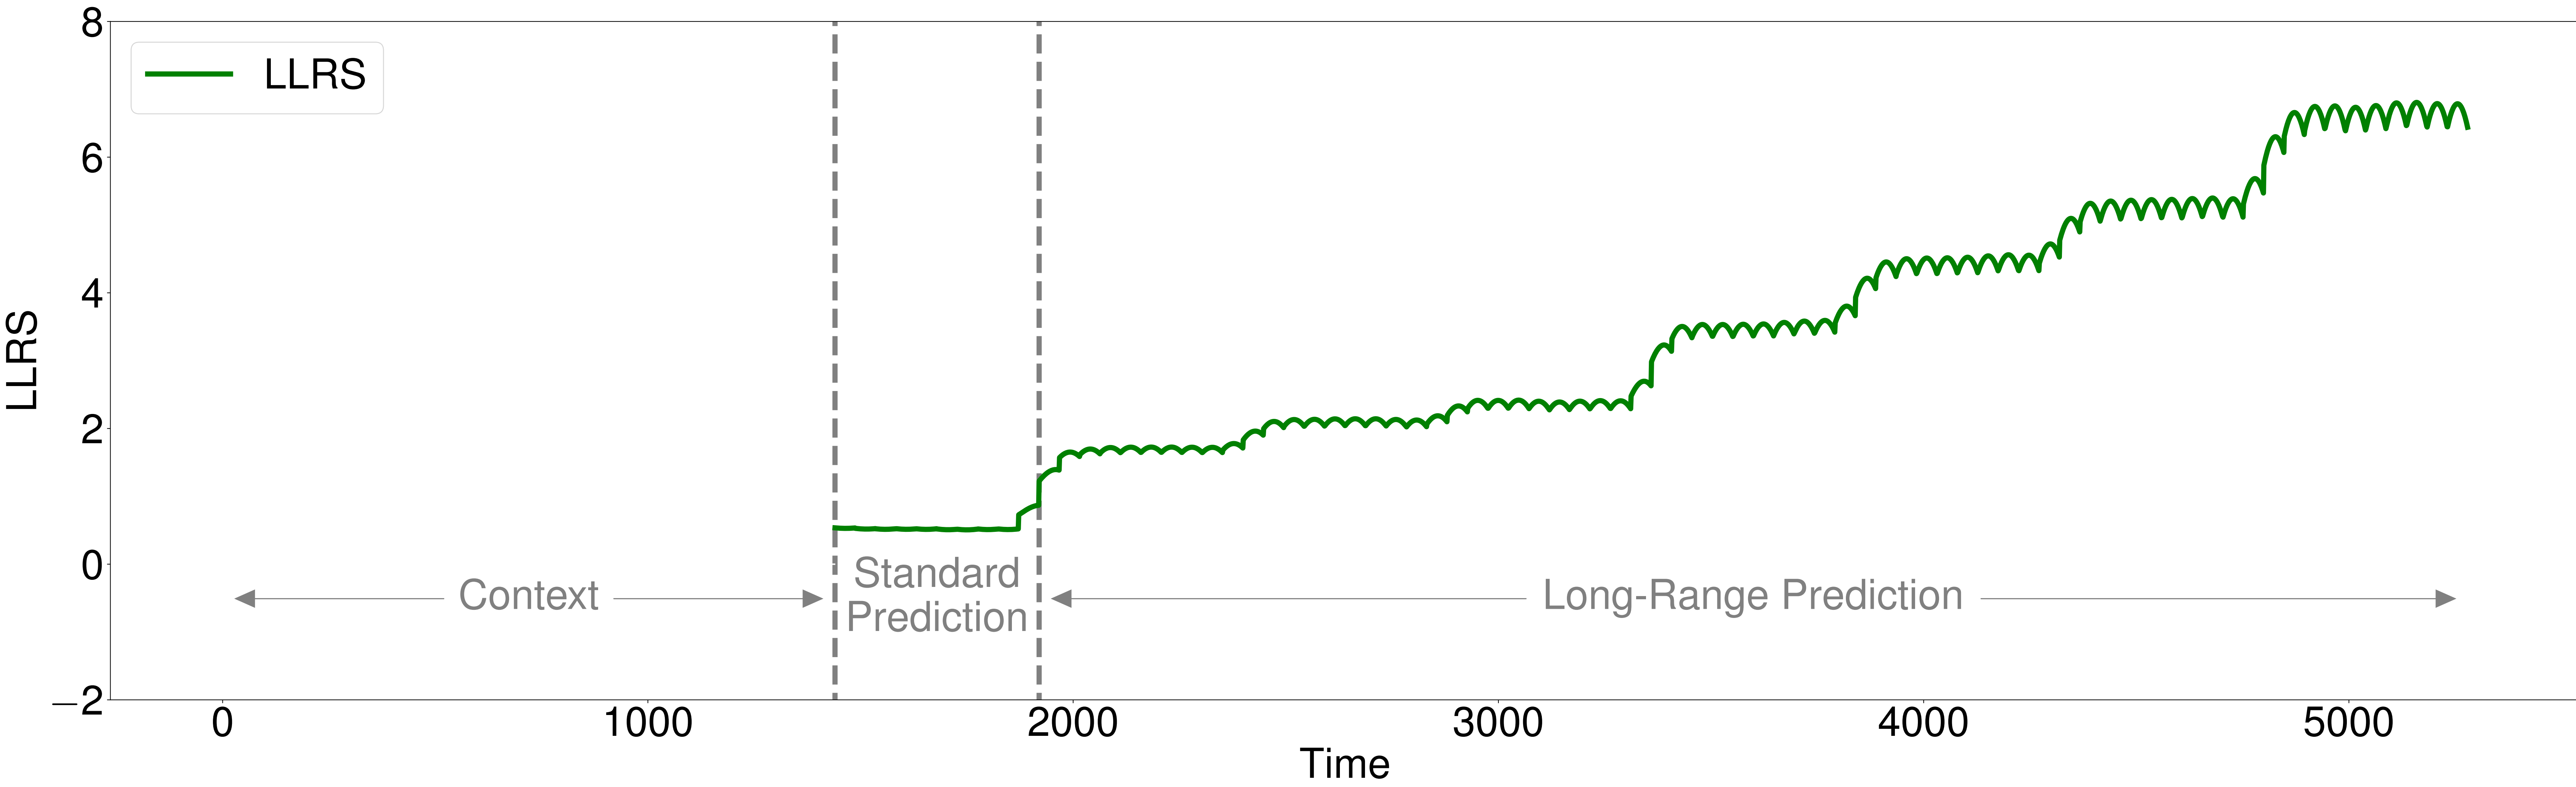

Supplement: supplementary_material [file attachment]

# Power

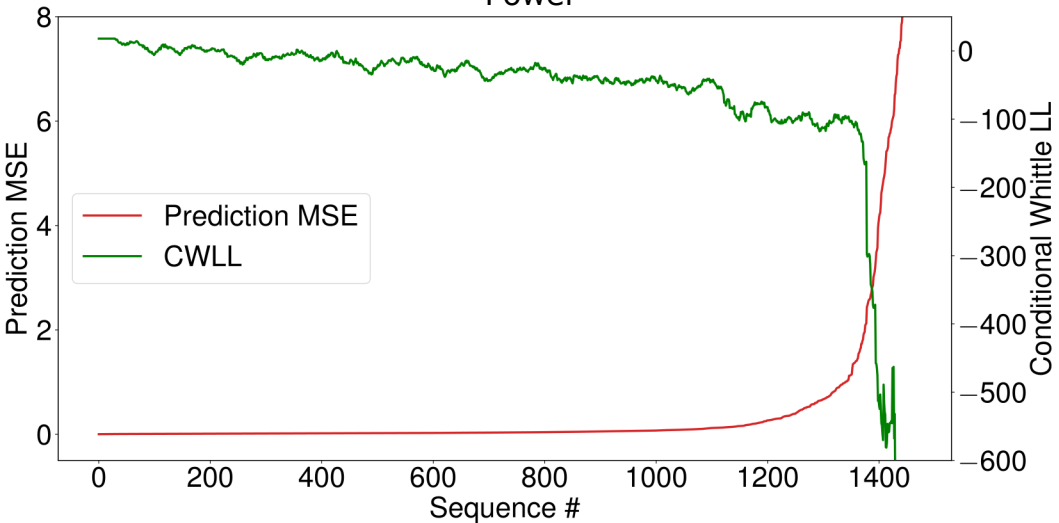

Supplement: supplementary_material [file attachment]
